# Supplementary material for: Development of a prokaryotic-like polycistronic expression system based on a virus-originated internal ribosome entry site (IRES) in industrial eukaryotic microorganisms
Source: Royal Society of Chemistry journal article supplement (doi:10.1039/c4ra07679f), 2014-01-01
Supplement: c4ra07679f1.pdf [file c4ra07679f1.pdf]

## Supporting Information

# Development of a prokaryotic-like polycistronic expression system based on a virus-originated internal ribosome entry site (IRES) in industrial eukaryotic microorganisms

L.L. Xu,<sup>a,b#</sup> G. Wang,<sup>b#</sup> W.Y. Wang,<sup>a</sup> X. F. Lv,<sup>a</sup> Q. Li,<sup>b\*</sup> A. X. Yan<sup>a</sup>

## Experimental Section

### Strains, plasmids, media and growth conditions

Strains, plasmids and primers are listed in **Table S1, Table S2 and Table**

**S3.** *Escherichia coli* DH5 $\alpha$  was cultivated in LB medium at 37 °C, 230 rpm and

*Pichia pastoris* strain GS115 was grown in YPD medium at 28 °C, 230 rpm. YEB

medium was prepared for the growth of *Agrobacterium tumefaciens* LBA4404 at 28

°C, 230 rpm and IM medium containing 200 mM acetosyringone (AS) (Sigma, USA)

was for transformation. *Acremonium chrysogenum* was cultivated in YPS medium and

fermented in a specific fermentation medium included seeds medium (g·L<sup>-1</sup>) (corn

steep liquor, 60; sucrose, 35; glucose, 5; DL-Met, 0.5; (NH<sub>4</sub>)<sub>2</sub>SO<sub>4</sub>, 8; CaCO<sub>3</sub>, 0.5; pH

6.5) and fermentation medium (g·L<sup>-1</sup>) (corn steep liquor, 100; starch, 30; dextrin, 60;

glucose, 5; DL-Met, 6; K<sub>2</sub>HPO<sub>4</sub>, 9; MgSO<sub>4</sub>·7H<sub>2</sub>O, 3; (NH<sub>4</sub>)<sub>2</sub>SO<sub>4</sub>, 13; CaCO<sub>3</sub>, 10;

bean oil, 20 mL; trace elements: FeSO<sub>4</sub>, 0.16; MnSO<sub>4</sub>, 0.04; ZnSO<sub>4</sub>, 0.04; CuSO<sub>4</sub>,

0.04; pH 6.2) at 28 °C, 230 rpm.

### Construction of the plasmids

pPIC02-vIh: The DNA fragment *vgb*-IRES-*hph* was amplified using plasmid pDH25-

vIh as the template and *vgb*-up and *hph*-down as the primers. The PCR fragment was

ligated with T-vector pPIC02-T by T-A ligation. *E.coli* DH5 $\alpha$  was selected as the host. Transformants were selected by LB agar medium with 50 $\mu$ g ml<sup>-1</sup> kanamycin and positive colonies were screened by colony PCR. Detailed scheme for vector construction is depicted in **Figure S1**.

pBI121-vIh: The DNA fragment of *vgb*-IRES-*hph* as well as the promoter(P<sub>trp</sub>) and terminator(T<sub>trp</sub>) was digested by EcoR I/Xba I into three segments and the two shorter ones were ligated with plasmid pBI121 successively. *E.coli* DH5 $\alpha$  was selected as the host. Transformants were selected by LB agar medium with 50 $\mu$ g ml<sup>-1</sup> kanamycin and positive colonies were screened by colony PCR. A detailed scheme for vector construction is depicted in **Figure S2**.

### **Transformation of *Pichiapastoris***

Competent *Pichiapastoris* strain GS115 was transformed with linearized pPIC02-vIh by the electroporation according to the methods reported<sup>1</sup>. Electro-competent cells (100 $\mu$ L) were mixed with 20 $\mu$ g linearized pPIC02-vIh plasmid in a 0.2 cm electroporation cuvette and pulsed for 6 ms with a field strength of 1.25 $\times 10^6$  V/m using the electroporation apparatus BTX ECM399. The transformants were screened on the MM plate containing Hygromycin B (200 $\mu$ g/ml) from the colonies emerged after being spread on the MD antibiotic free plate for 2 days. The transformed agar plates compared with the control please refer to **Figure S3**.

### **Analysis of the hereditary stability of recombinant *Pichiapastoris***

The analysis of the hereditary stability of recombinant *Pichiapastoris* was carried out

by 5 pass-generation tests. For each test, the recombinant *Pichiapastoris* strain was first incubated in a flask of 5ml liquid YPD media at 230 rpm and 28°C for 24h, and then 5µL broth was transferred to another flask of fresh liquid YPD media for the next test. 10µL broth of each test was diluted 10<sup>7</sup>-fold, 200µL of which was then spread on solid YPD medium and incubated at 28°C for 2 days. 60 colonies were selected randomly from the ones emerged on the solid YPD medium and transferred to the solid MM medium with Hygromycin B (200µg/ml) or without antibiotic. The hereditary stability was described by the ratio of colony numbers on antibiotic MM media to antibiotic-free MM media for the 5 pass-generation tests.

### ***Agrobacterium tumefaciens*-mediated transformation (ATMT) of *Acremonium chrysogenum***

*A. tumefaciens* strain LBA4404 was chosen to transform *Acremonium chrysogenum*. The binary plasmid pBI121-vIh, with vgb-IRES-hph gene under the control of *Aspergillus nidulans* trpC promoter, was transformed into the *A. tumefaciens* competent cells using the freeze–thaw method<sup>2</sup>. The transformant was then grown in YEB liquid medium with kanamycin (50µg/ml) and rifampicin (50µg/ml) for 48h at 230 rpm and 28°C. The bacterial cells were collected by centrifuge, resuspended to OD<sub>600</sub>=0.15 with IM medium containing 200 mM acetosyringone (AS) (Sigma, USA)<sup>3</sup> and re-incubated at 28°C until the density reached 0.5 (OD<sub>600</sub>)<sup>4</sup>. The *A. chrysogenum* mycelia, chosen as the receptor, were collected after the incubation in YPS liquid medium at 230 rpm and 28°C for 5 days and then grinded with pestle in order to improve the transformation efficiency. 100µL wet mycelia of *A. chrysogenum* and

100µL suspension of *A.tumefaciens* cells were co-incubated at 230 rpm and 28°C for 48h and then spread on the YPS medium with 200 µMcefotaxime and 6µg/ml hygromycin B for screening positive transformants. The transformed agar plates compared with the control please refer to **Figure S3**.

### **Low oxygen stress experiment**

The transformant and wild type *A. chrysogenum* were both inoculated in YPS liquid medium at 230 rpm and 28°C for 5 days. The supernatant of broth containing spores was collected and diluted to OD600=0.2536. The diluted supernatant was first inoculated to seeds medium (g/L) (corn steep liquor, 60; sucrose, 35; glucose, 5; DL-Met, 0.5; (NH<sub>4</sub>)<sub>2</sub>SO<sub>4</sub>, 8; CaCO<sub>3</sub>, 0.5; pH 6.5) and incubated at 230 rpm and 28°C for 3 days. Fresh fermentation medium (g/L) ( corn steep liquor, 100; starch, 30; dextrin, 60; glucose, 5; DL-Met, 6; K<sub>2</sub>HPO<sub>4</sub>, 9; MgSO<sub>4</sub>·7H<sub>2</sub>O, 3; (NH<sub>4</sub>)<sub>2</sub>SO<sub>4</sub>, 13; CaCO<sub>3</sub>, 10; bean oil, 20 mL; trace elements: FeSO<sub>4</sub>, 0.16; MnSO<sub>4</sub>, 0.04; ZnSO<sub>4</sub>, 0.04; CuSO<sub>4</sub>, 0.04; pH6.2) of different volumes in a 300mL flask was inoculated with the seeds broth by 10% volume ratio. Medium volumes were set to 30, 50, 70, 90, 110mL to create different oxygen availabilities. Each fermentation broth was centrifuged after 7 days' incubation. The supernatant was collected for cephalosporin C (CPC) production analysis and the sediment was dried and weighed.

### **Analysis of the hereditary stability of recombinant *Acremonium chrysogenum***

The analysis of the hereditary stability of recombinant *A. chrysogenum* was carried out by serial inoculation and incubation for 5 times. The *A. chrysogenum* transformant was first incubated in liquid YPS media at 28°C and 230rpm for 5 days and then 10µL

broth supernatant (spore suspension) was diluted  $10^7$ -fold, 200 $\mu$ L of which was spread on the solid YPS medium without antibiotics to obtain single colonies and 5 $\mu$ L undiluted broth was transferred to fresh liquid YPS media for the next test. 50 colonies were selected randomly from the ones emerged on the YPS medium without antibiotics and transferred to the YPS medium with Hygromycin B (6 $\mu$ g/ml). The hereditary stability was described by the ratio of colony numbers on antibiotic media to antibiotic free media for the 5 pass-generation tests.

### **Cylinder plate method**

Cup plate method using YPS agar medium was employed, based on the sensibility of the *Bacillus cereus* strain 1.1687 to CPC. 25 mL YPS agar medium was poured into a 100 mm  $\times$  20 mm petri dish. After the medium solidified, 200 $\mu$ L broth of *Bacillus cereus* strain 1.1687 was spread. In each plate, 5 oxford cups (6mm  $\times$  7.8mm  $\times$  10mm) were placed on the surface of medium and each oxford cup was filled with 200 $\mu$ L broth of *A. chrysogenum*. The plates were incubated at 28 $^{\circ}$ C for 24h. The diameters of the growth inhibition zone were carefully measured. All experiments were performed in a clean bench and repeated for three times. As a rapid screening method rather than quantified analysis, the results of the cylinder plate method would be further confirmed by the high performance capillary electrophoresis (HPCE) analysis.

### **High performance capillary electrophoresis (HPCE) analysis of CPC production**

The capillary electrophoresis (CE) analysis was performed by Beckman P/ACETM MDQ Capillary Electrophoresis system (Beckman Coulter, USA) equipped with an on-column UV-visible detector, using 0.2% D-phenylglycine as the internal

standard substance and 10 mM phosphate buffer of pH 6.5 as the running buffer. Standard solutions and the running buffer were all pre-filtered through a syringe with the cellulose acetate filter (0.22 $\mu$ m). Each 100 $\mu$ L sample of the culture supernatant of *A. chrysogenum* was diluted with 400 $\mu$ L internal standard substance and filtered through a syringe with the cellulose acetate filter (0.22 $\mu$ m) prior to CE analysis. CE was performed at separation voltage of 30 kV with the running buffer. Capillary temperature was controlled at 25°C and detection wavelength was set at 254 nm. Sample injection was performed at 0.5 psi for 5 s. Before the next run, the capillary was successively washed with 0.2M HNO<sub>3</sub>, deionized water, 0.2M NaOH and deionized water for 3 min each and then rinsed with the running buffer for 3 min. The concentration of CPC was calculated according the peak area of CPC and the internal standard substance on the electrophoretogram.

## Tables and Figures

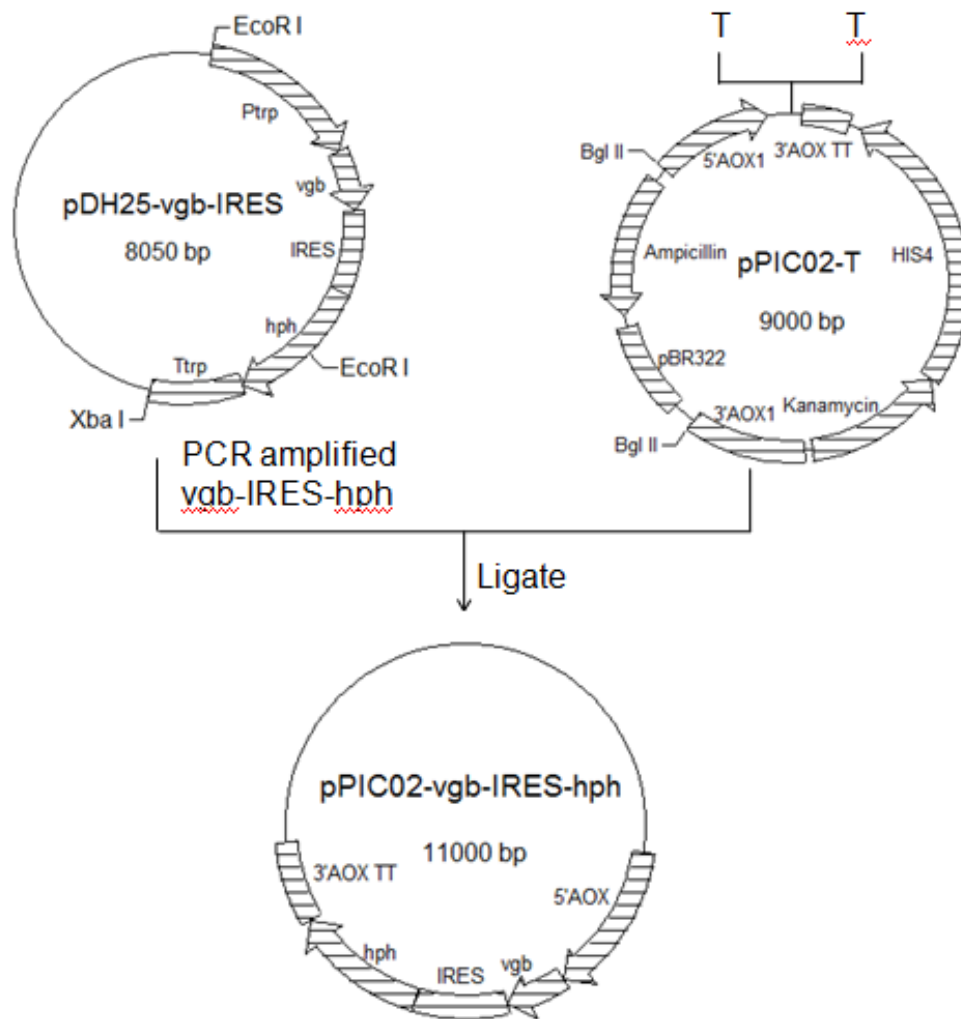

**Figure S1.**Construction of plasmid pPIC02-vIh

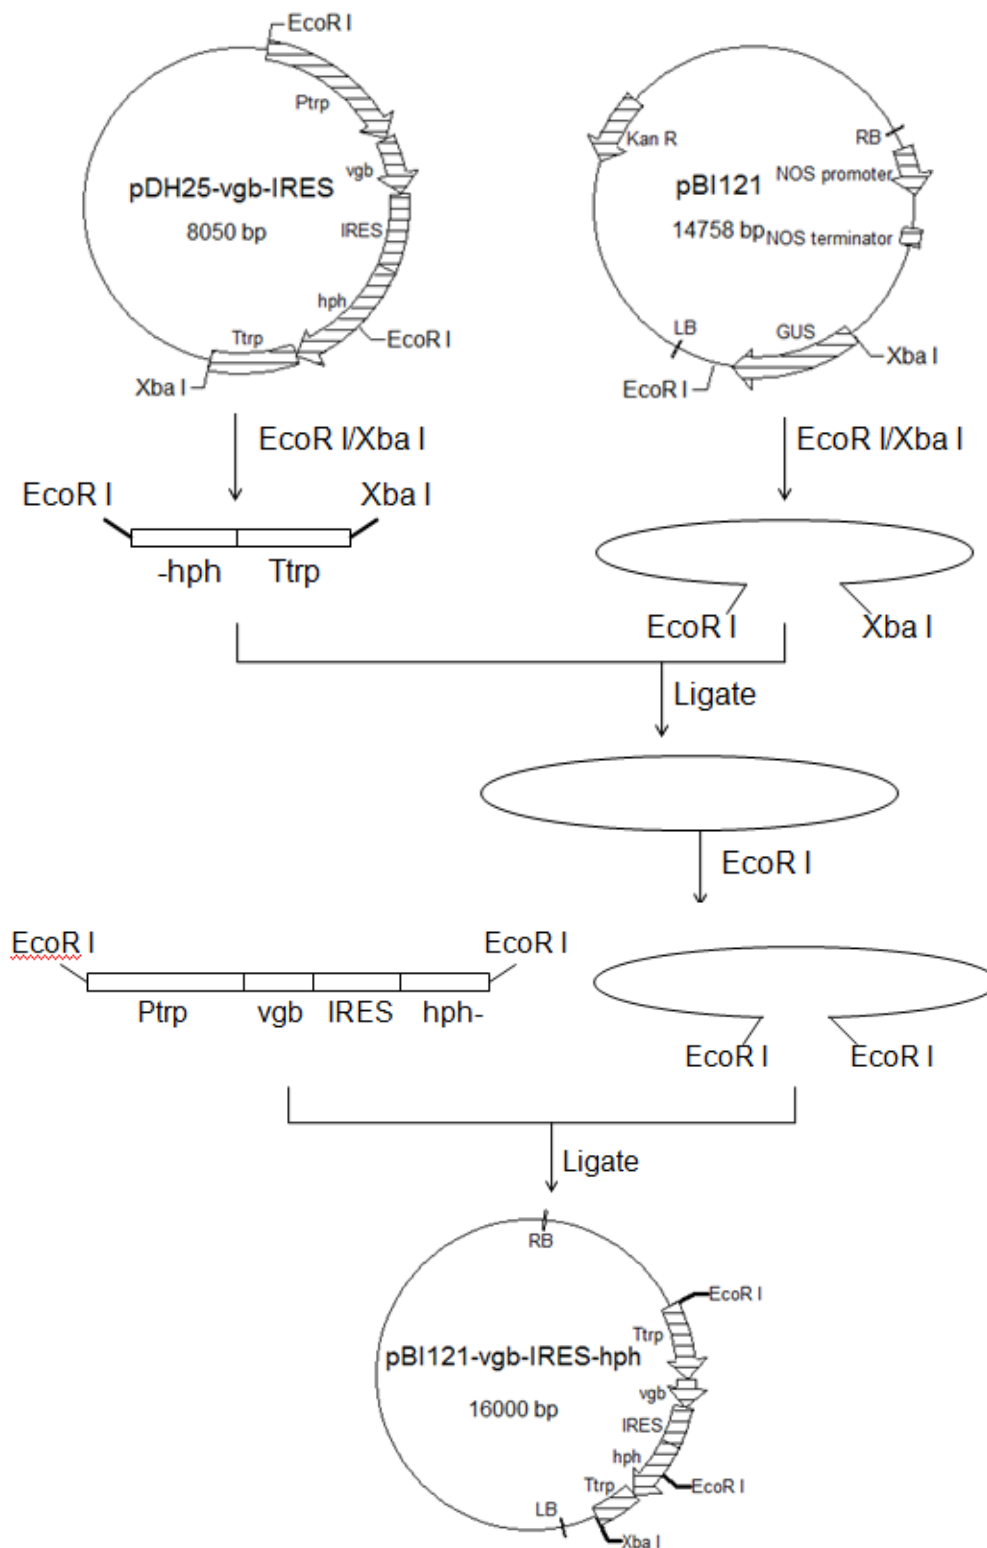

**Figure S2.**Construction of plasmid pBI121-vlh



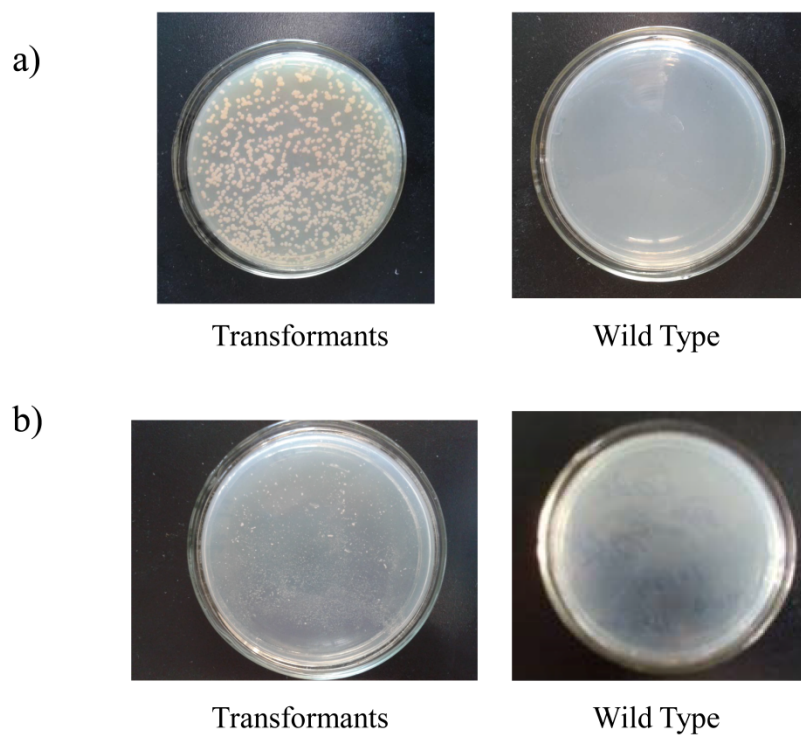

**Figure S3.** Transformed agar plates compared with the control

a) *Pichia pastoris*

b) *Agrobacterium tumefaciens*-mediated transformation (ATMT) of *Acremonium chrysogenum*

**Table S1.**Strains used in this study

| Name                                     | Description                                                                                                                                            | Source         |
|------------------------------------------|--------------------------------------------------------------------------------------------------------------------------------------------------------|----------------|
| <i>E. coli</i> DH5 $\alpha$              | F - $\phi$ 80<br>lacZ $\Delta$ M15 $\Delta$ (lacZYA-<br>argF) U169 end A1 recA1<br>hsdR17(rk -,mk -) sup E44<br>$\lambda$ - thi-1 gyrA96 relA1<br>phoA | Biomed         |
| <i>Bacillus cereus</i> 1.1687            | Sensitive to CPC                                                                                                                                       | Lab collection |
| <i>Agrobacterium tumefaciens</i> LBA4404 | Used for mediumed<br>transformation of<br><i>A.chrysogenum</i>                                                                                         | Lab collection |
| <i>Pichiapastoris</i> GS115              | Host                                                                                                                                                   | Lab collection |
| <i>Acremoniumchrysogenum</i>             | Host                                                                                                                                                   | Lab collection |

**Table S2.** Plasmids used in this study

| <b>Name</b> | <b>Description</b>                                             | <b>Source</b> |
|-------------|----------------------------------------------------------------|---------------|
| pDH25-vlh   | Plasmid pDH25 with the <i>vgb</i> -IRES- <i>hph</i> gene       | This study    |
| pPIC02-T    | T-vector from plasmid pPIC3.5K                                 | This study    |
| pBI121      | Plasmid coding T-DNA for Agrobacterium-mediated transformation | This study    |
| pPIC02-vlh  | Plasmid pPIC02 with the <i>vgb</i> -IRES- <i>hph</i> gene      | This study    |
| pBI121-vlh  | Plasmid pBI121 with the <i>vgb</i> -IRES- <i>hph</i> gene      | This study    |

**Table S3.** Primers used in this study

| Name                          | Sequence 5'-3'                                         |
|-------------------------------|--------------------------------------------------------|
| <i>vgb</i> -up                | ATGTTAGACCAGCAAACC                                     |
| <i>hph</i> -down              | CGGTCGGCATCTACTCTATTCCTTT                              |
| 3' AOX                        | GGCAAATGGCATTCTGACAT                                   |
| 5' AOX                        | GACTGGTTCCAATTGACAAGC                                  |
| <i>cefG</i> -up               | ATGCTGCCGTCGGCCCAAGTGGCCC                              |
| <i>cefG</i> -down             | TCACATTAATGACTGATCGAGGAATCCTCTGACGGCATCATTAACCTT<br>GT |
| <i>vgb</i> -ClaI <sup>+</sup> | CCATCGATATGTTAGACCAGCAAACCA                            |
| <i>hph</i> -SpeI <sup>-</sup> | GGACTAGTTTATTCAACCGCTTGAGCG                            |

**Table S4.** Hereditary Stability Test of *Pichiapastori*

| Generation of<br>the strains | inoculated | Colony number            |                   | Exogenous gene<br>retention rate |
|------------------------------|------------|--------------------------|-------------------|----------------------------------|
|                              |            | Strains in the MM medium | Strains in the MM |                                  |
|                              |            | without Hyg B            | medium with Hyg B |                                  |
| 1                            | 60         | 60                       | 60                | 100%                             |
| 2                            | 60         | 60                       | 60                | 100%                             |
| 3                            | 60         | 60                       | 60                | 100%                             |
| 4                            | 60         | 60                       | 60                | 100%                             |
| 5                            | 60         | 60                       | 60                | 100%                             |

**Table S5.** Hereditary Stability Test of *Acremoniumchrysogenum*

| passage number | Generation of<br>each passage | Colony number<br>inoculated | Strains in the MM<br>medium with Hyg B | Exogenous gene<br>retention rate |
|----------------|-------------------------------|-----------------------------|----------------------------------------|----------------------------------|
| 1              | 5                             | 50                          | 50                                     | 100%                             |
| 2              | 5                             | 50                          | 50                                     | 100%                             |
| 3              | 5                             | 50                          | 50                                     | 100%                             |
| 4              | 5                             | 50                          | 50                                     | 100%                             |
| 5              | 5                             | 50                          | 50                                     | 100%                             |

## References

1. S. Wu and G. J. Letchworth, *Biotechniques* 2004,**36**, 152-155.
2. G. Jyothishwaran, D. Kotresha, T. Selvaraj, S. Srideshikan, P. Rajvanshi and C. Jayabaskaran, *Curr. Sci.* 2007,**93**, 770-772.
3. C. B. Michielse, P. J. Hooykaas, C. A. van den Hondel and A. F. Ram, *Nat. protoc.* 2008,**3**, 1671-1678.
4. J. P. Combier, D. Melayah, C. Raffier, G. Gay and R. Marmeisse, *FEMS microbial. lett.* 2003,**220**, 141-148
